# Supplementary material
Source: ML conference proceedings conference paper supplement (https://openreview.net/forum?id=32BLljqMbd)

# Number of Verified Ranks, KernelSHAP

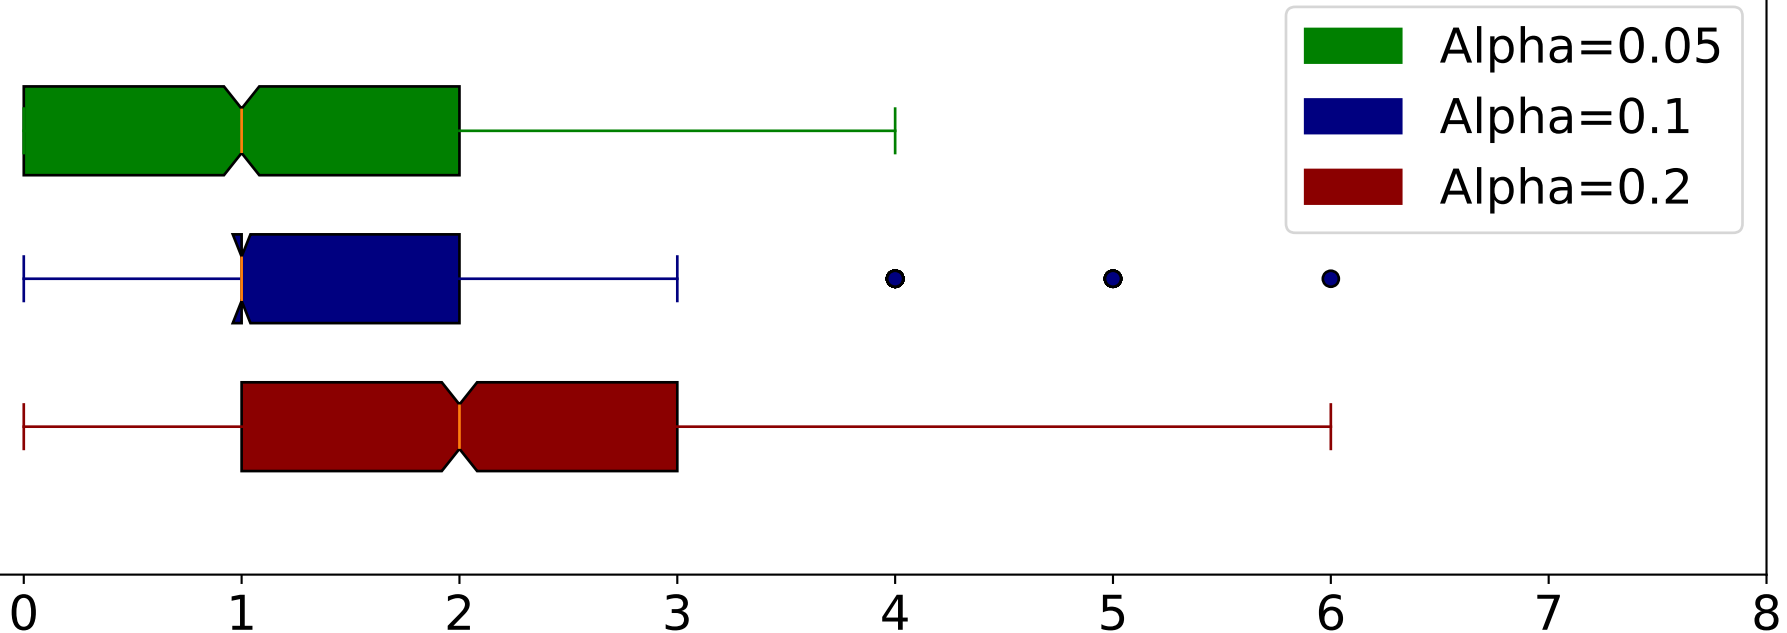

Supplement: supplementary_material [file attachment]

# Frequency of Top-5 Feature Rankings

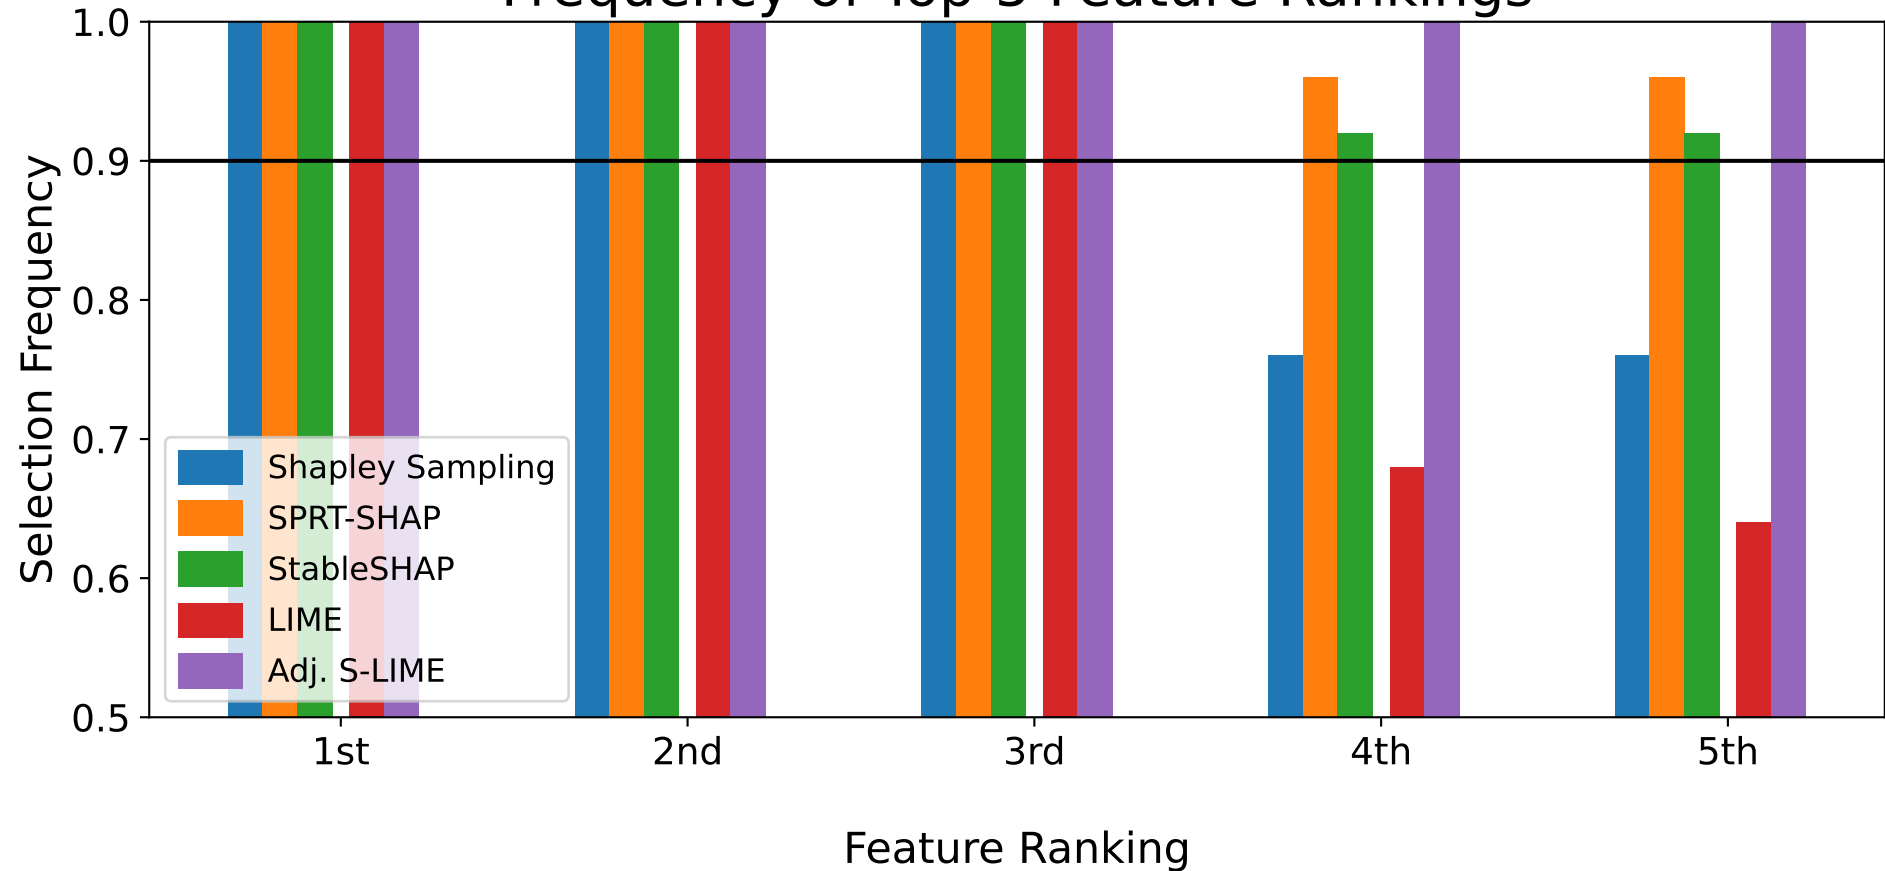

Supplement: supplementary_material [file attachment]

# StableSHAP Samples per Feature, K=5

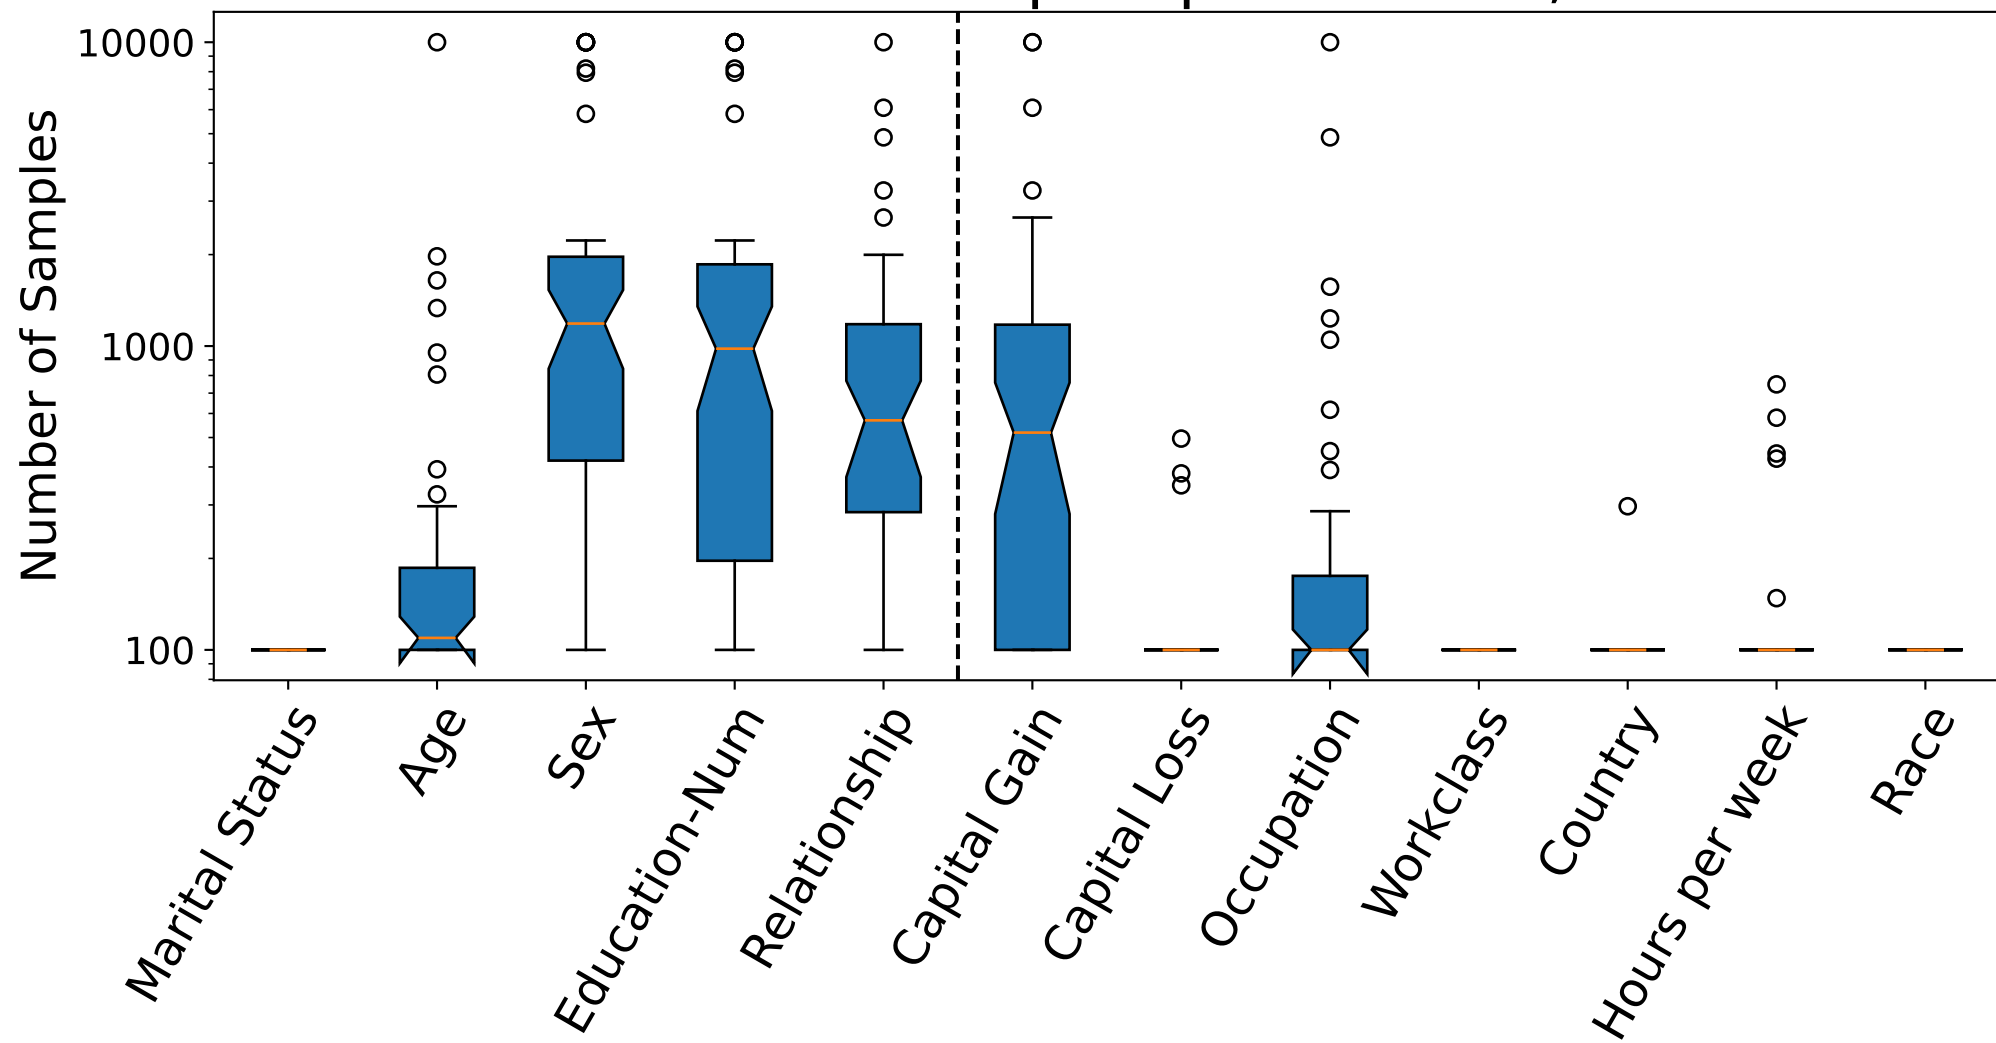

Supplement: supplementary_material [file attachment]

Ordered Variances of StableSHAP Values, K=5

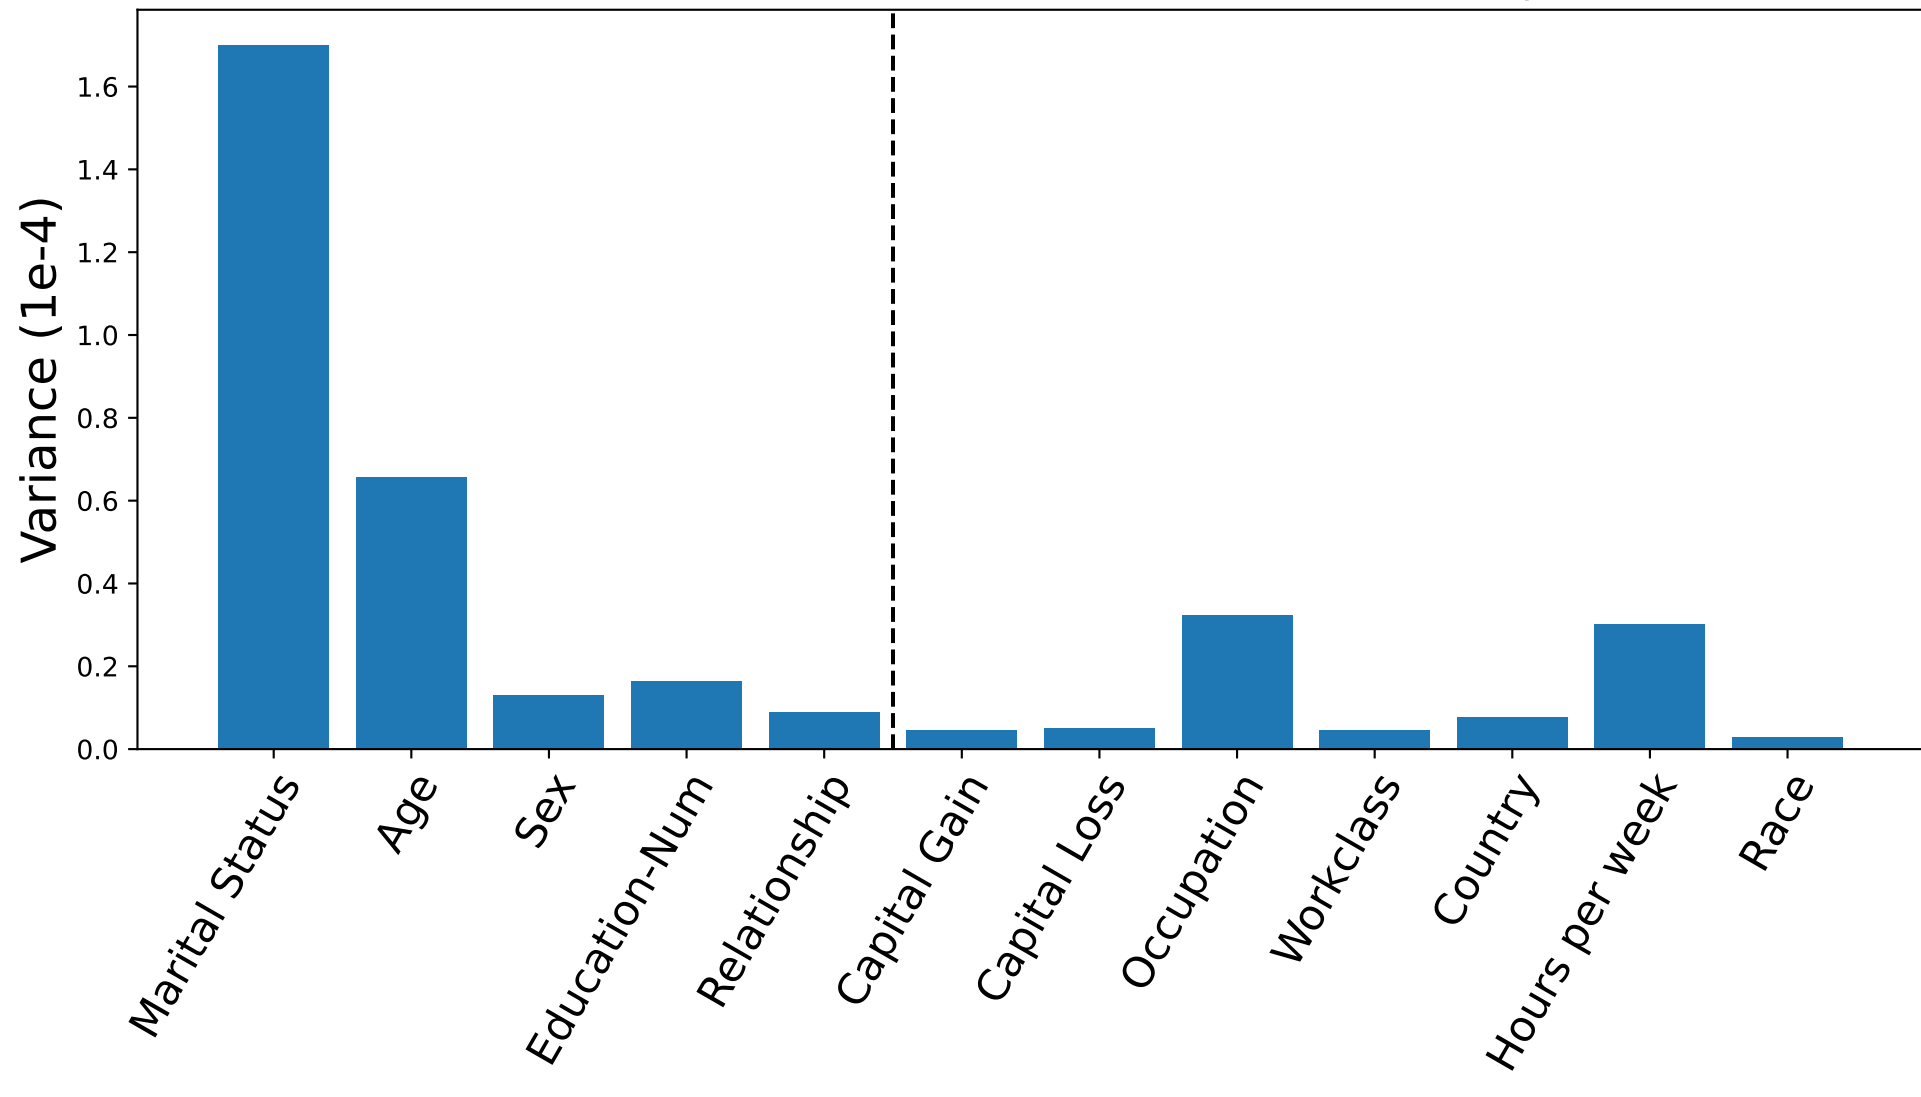

Supplement: supplementary_material [file attachment]

# FWERs of Top-K SHAP Rankings

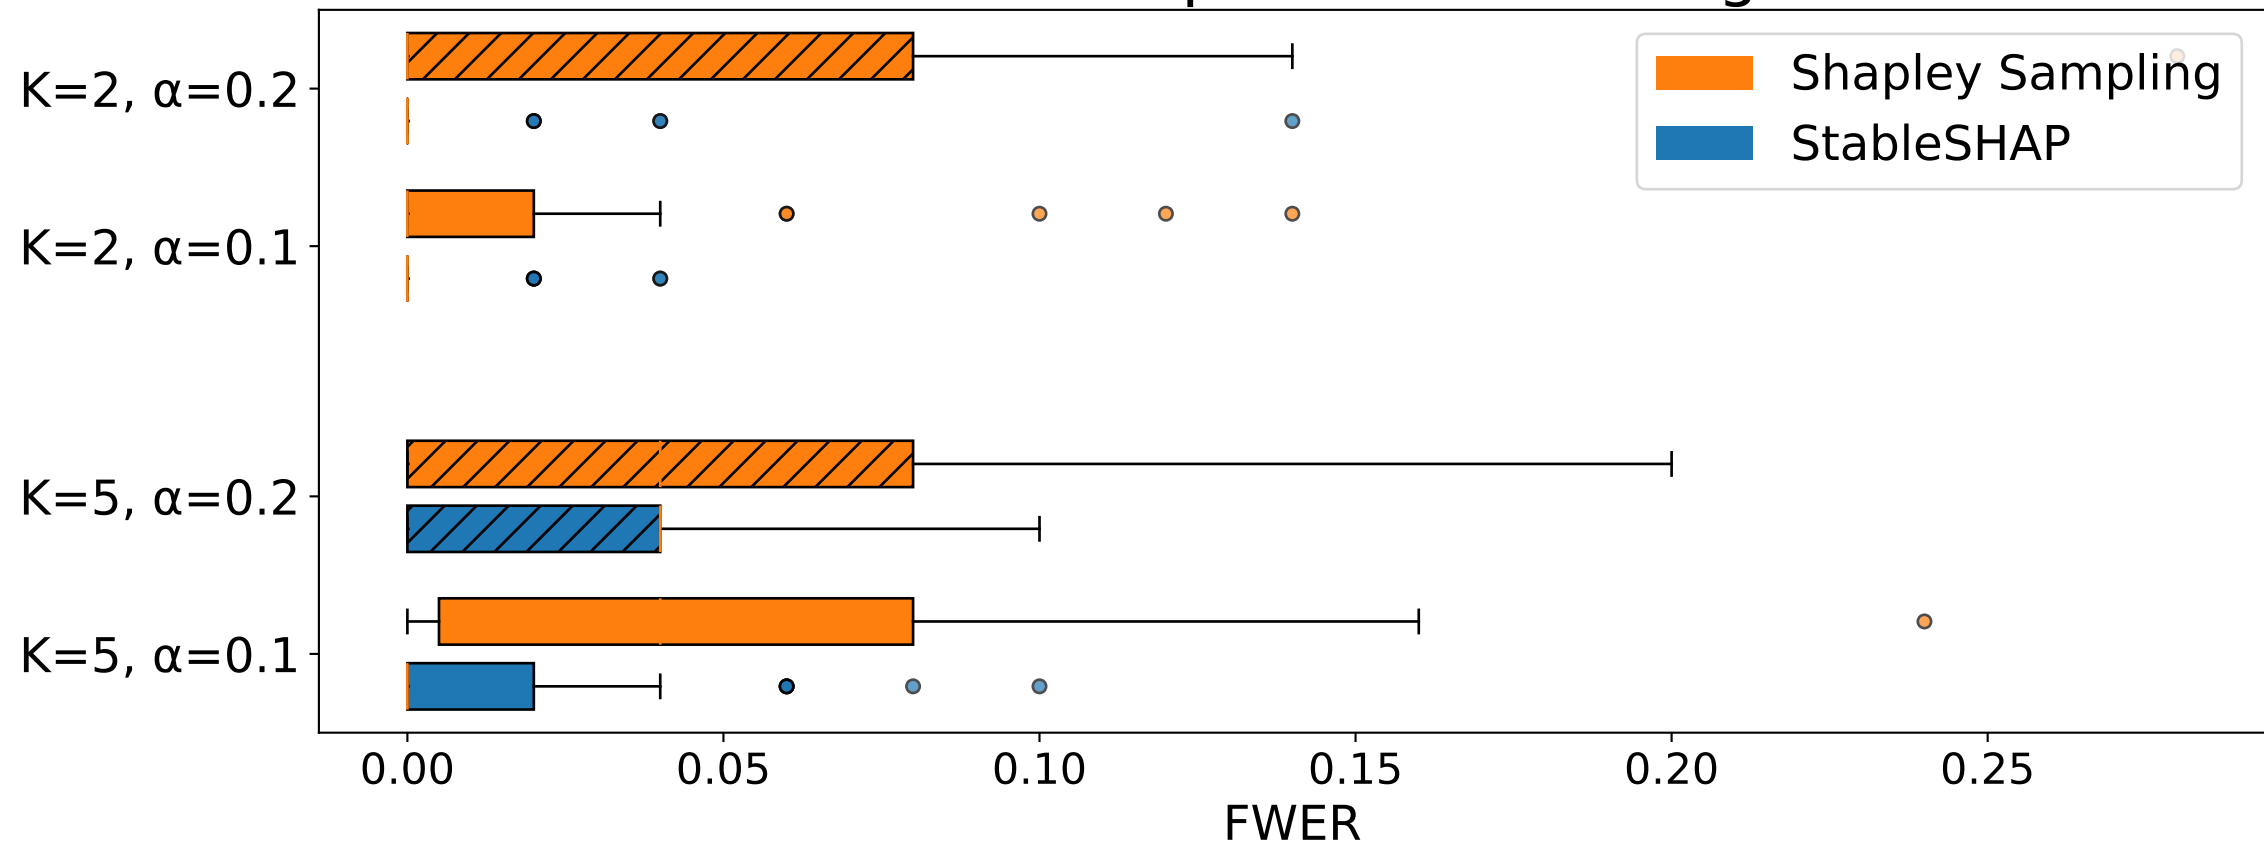

Supplement: supplementary_material [file attachment]

# Samples to Top-2 Convergence

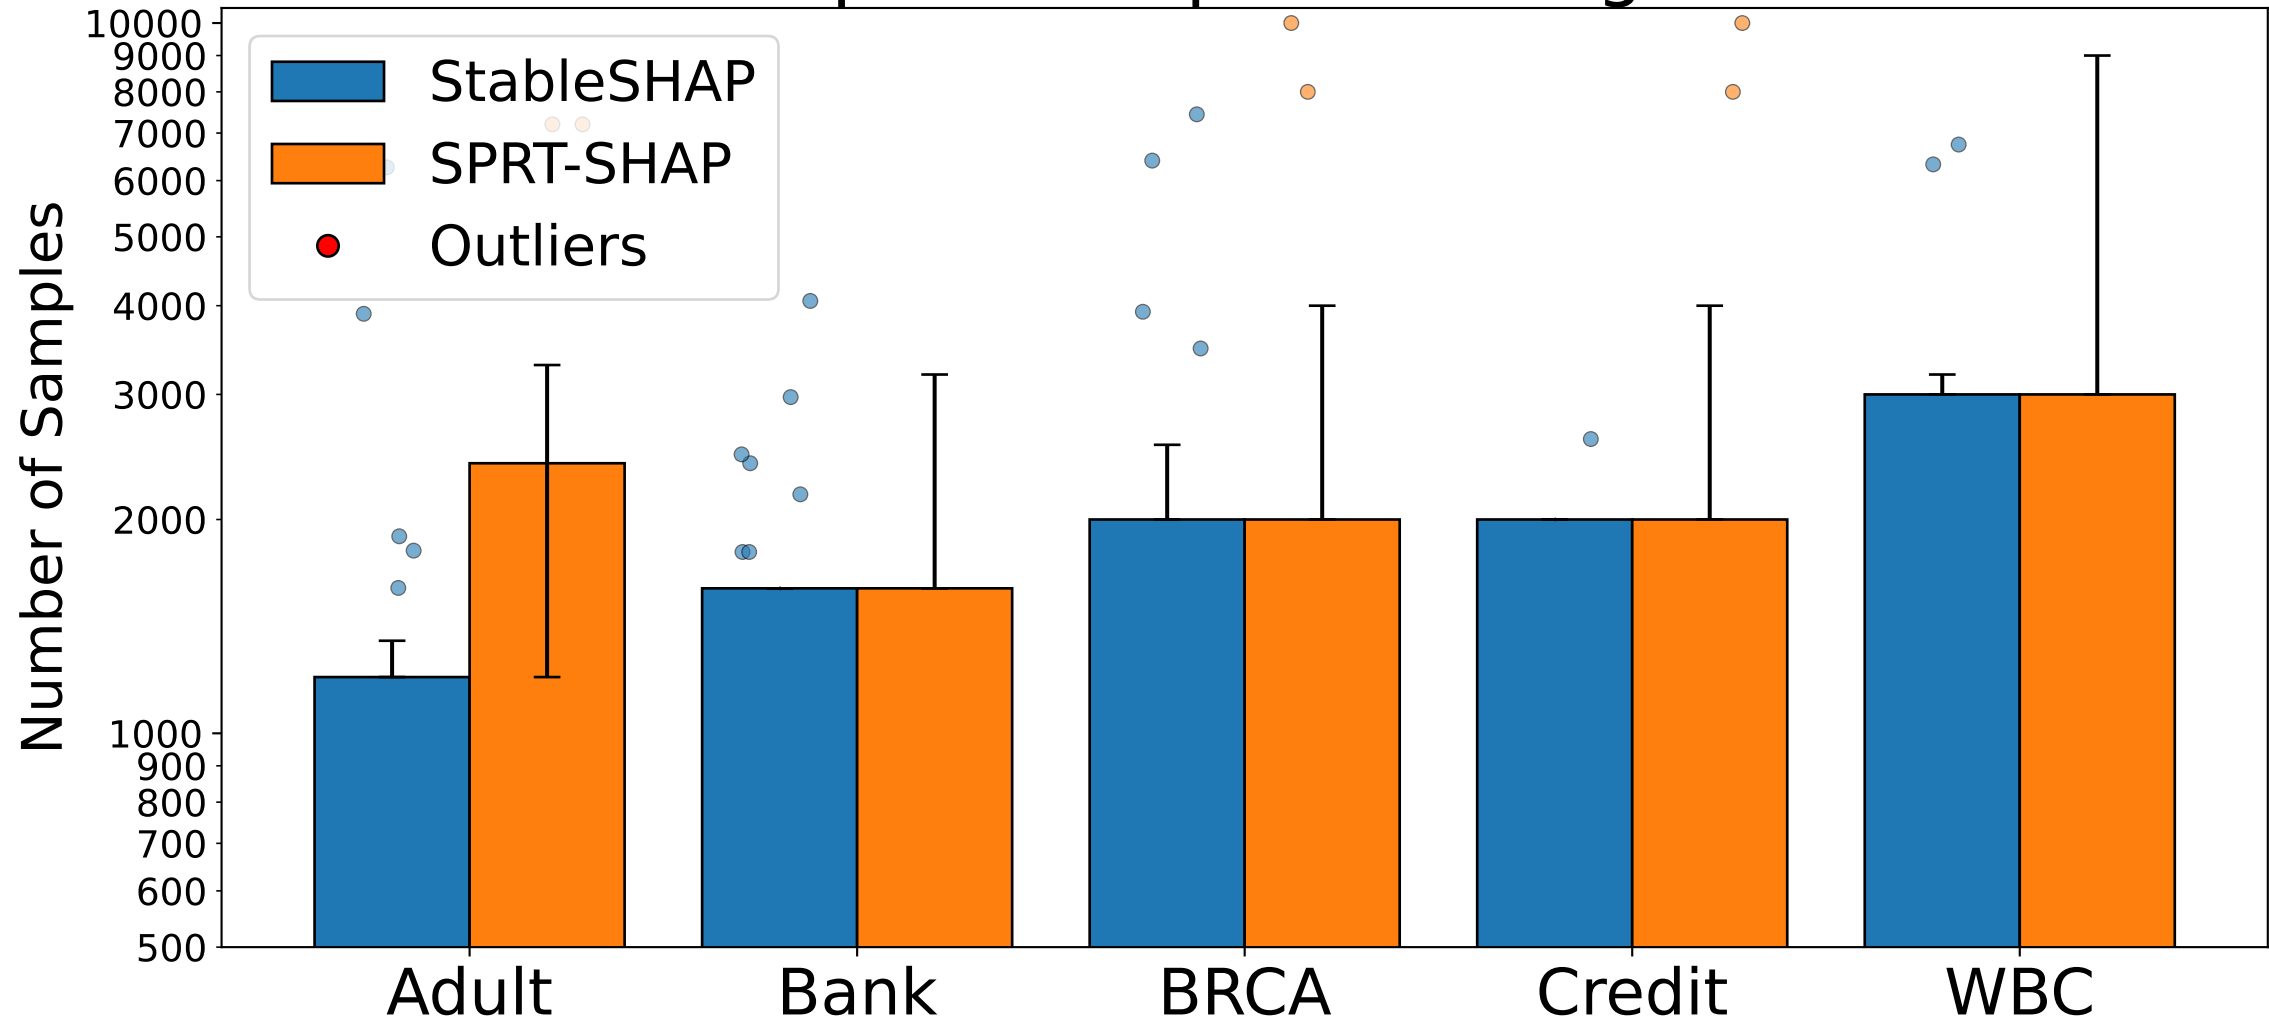

Supplement: supplementary_material [file attachment]
